## Perfluorodecanoic acid (PFDA) promotes gastric cell proliferation via sPLA2-IIA

Tianyi Dong<sup>1,2,\*</sup>, Yanping Peng<sup>1,\*</sup>, Ning Zhong<sup>3</sup>, Fengyan Liu<sup>3</sup>, Hanyu Zhang<sup>1</sup>, Mengchen Xu<sup>4</sup>, Rutao Liu<sup>4</sup>, Mingyong Han<sup>5</sup>, Xingsong Tian<sup>2</sup>, Jihui Jia<sup>1</sup>, Lap Kam Chang<sup>1</sup>, Liang-Hong Guo<sup>6</sup> and Shili Liu<sup>1</sup>

<sup>1</sup>School of Medicine, Shandong University, Jinan, Shandong, 250012, China

<sup>2</sup>Department of Breast Thyroid Surgery, Shandong Provincial Hospital, Shandong University, Jinan, Shandong, 250021, China

<sup>3</sup>Department of Gastroenterology, Qilu Hospital of Shandong University, Jinan, Shandong, 250012, China

<sup>4</sup>School of Environmental Science and Engineering, Shandong University, Jinan, Shandong, 250100, China

<sup>5</sup>Cancer Therapy and Research Center, Shandong Provincial Hospital, Shandong university, Jinan, Shandong 250021, China

<sup>6</sup>State Key Laboratory of Environmental Chemistry and Ecotoxicology, Research Center for Eco-Environmental Sciences, Chinese Academy of Sciences, Beijing 100085, China

\*These authors contributed equally to this work

**Correspondence to:** Liang-Hong Guo, **email:** lhguo@rcees.ac.cn  
Shili Liu, **email:** liushili@sdu.edu.cn

**Keywords:** PFDA, proliferation, sPLA2-IIA, TCF4

**Received:** September 06, 2016

**Accepted:** April 05, 2017

**Published:** April 20, 2017

Copyright: Dong et al. This is an open-access article distributed under the terms of the Creative Commons Attribution License 3.0 (CC BY 3.0), which permits unrestricted use, distribution, and reproduction in any medium, provided the original author and source are credited.

### ABSTRACT

**The association of perfluorodecanoic acid (PFDA) with tumor promotion and associated effects is not clear. Given that PFDA is mostly consumed with food and drinking water, we evaluated the effects of PFDA on a gastric cell line. When added to cell cultures, PFDA significantly increased growth rate and colony forming ability compared with control treatment. We found that suppression of cell senescence, but not apoptosis or autophagy was associated with PFDA-induced promotion of cell amount. To determine the molecular mechanism that was involved, DNA microarray assays was used to analyze changes in gene expression in response to PFDA treatment. Data analysis demonstrated that the vascular endothelial growth factor signaling pathway had the lowest *p*-value, with sPLA2-IIA (*pla2g2a*) exhibits the most altered expression pattern within the pathway. Moreover, sPLA2-IIA and its transcription factor TCF4, known as a direct target and a binding partner of Wnt/ $\beta$ -catenin signaling in gastric cells respectively, were the third and second most varied genes globally. Cells transfected with expression plasmids pENTER-*tcf4* and pENTER-*pla2g2a* show reduced cell proliferation by more than 60% and 30% respectively. Knockdown with sPLA2-IIA siRNA provided additional evidence that sPLA2-IIA was a mediator of PFDA-induced cell senescence suppression. The results suggest for the first time that PFDA induced suppression of cell senescence through inhibition of sPLA2-IIA protein expression and might increased the proliferative capacity of an existing tumor.**

### INTRODUCTION

Perfluorinated carboxylic acids or perfluorinated fatty acids (PFCAs) have been used for decades to make products that resist heat, oil, and water. Because they are used in the manufacture of nonstick cookware, fire-fighting foam, and many other industrial products [1, 2], perfluorinated compounds can be detected globally in the

environment [3, 4], wildlife [5–8] and humans [9–15]. In recent years, perfluorochemicals have become recognized as a public health concern as evidence of environmental persistence has increased [16–19], and toxicity data has emerged in laboratory animals [20–25].

Perfluorodecanoic acid (PFDA) is a perfluorinated carboxylic acid that is known to increase peroxisome proliferation in rodents by inducing various peroxisomal

enzymes [26–28] as well as a series of mitochondrial, microsomal and cytosolic enzymes and proteins involved in lipid metabolism [29–32]. *In vivo*, PFDA is a highly potent and persistent peroxisome proliferator [33]. It is several times as toxic as perfluorooctanoic acid (PFOA) [34]. PFDA produces toxic effects similar to those caused by dioxin (2, 3, 7, 8-tetrachlorodibenzodioxin), and has been reported to produce hypophagia and severe weightloss, bradycardia, hypothermia, and decreased serum thyroid hormone levels in rats [34, 35]. The reported cellular and physiological effects of PFDA include reproductive [36–39], endocrine [35, 40–42], and liver toxicity and disturbances of lipid metabolism [30, 43–47], and the immune system [48]. Evidence of damage to genetic material included DNA strand breaks and fragmentation, chromosomal breaks, and apoptosis [49, 50]. PFDA accumulates at much higher concentrations than PFOA in human blood and organs and serum elimination half-life can last several years. However, despite the evidence of PFDA toxicity, little is known of how it acts in tumor promotion.

Gastric cancer is a common malignancy, and accounts for about 10% of all invasive cancers worldwide. It may be the second leading cause of cancer death, and in China, the total number of cases and deaths from gastric cancer have increased concomitant with extensive demographic changes and ongoing increase of environmental pollution. A positive correlation of gastric cancer with environmental pollution has been confirmed [51–53]. PFDA is present in air, food, and water, especially in China, where 0.139 ng/mL PFDA was detected in snow fall in the area around Beijing [4]. In China, the primary source of PFDA accumulated in human is primarily through the polluted drinking water and food source especially the seafood [54]. In this study, we evaluated the effects of PFDA in gastric cells.

In the current study, our results suggested sPLA2-IIA mediated suppression of PFDA-induced cell senescence and then stimulated cell proliferation. This report describes a new molecular mechanism by which PFDA promotes cell growth in gastric cells.

## RESULTS

### Effects of PFDA on cell amount

To assess effects on *in vitro* cell proliferation, we treated AGS gastric epithelial cells with PFDA and monitored growth with a Cell Counting Kit-8 (CCK8) and a colony forming assay. As shown in Figure 1A, the CCK8 assays found that cells incubated with certain concentration of PFDA had significantly increased cell amount compared with DMSO-treated control cells. Moreover, the growth response of AGS cells varied in response to stimulation by different PFDA concentrations, this cell amount-promotion effect was verified by hepatic

cell line Bel-7402 (Figure 1B) and another gastric cell line BGC823 (Supplementary Figure 1). More evidence was obtained from colony forming assay of AGS, PFDA enhanced colony forming ability by more than 70% compared with control cells (Supplementary Figure 2), which was significantly higher than that seen with PFOA, perfluorooctane sulfonate (PFOS) or other PFCs with longer chain length at the same concentration (PFOA and PFOS, 8C; PFDA, 10C; PFUDA, 11C; PFDoA, 12C; PFTeDA, 14C) (Figure 1C). The largest difference in growth rates was found on day 3 (Supplementary Figure 3). The results thus confirm that PFDA had an effect on the growth of human cells.

### PFDA enhanced gastric epithelial cells via suppressing senescence

Due to cell amount is generally affected by certain cellular processes such as apoptosis, autophagy and senescence, we used flow cytometry, western blots, and SA- $\beta$ -gal staining to determine which cellular process were modulated by PFDA treatment. Following treatment with PFDA for 72 h, flow cytometry showed no significant difference between in the percentages of apoptotic cells with (3.7%) or without (6.4%) the presence of PFDA in the culture media (Figure 2A and 2B). Furthermore, the western blot data showed no differences in degradation of autophagy substrates (p62) or lipidation of LC3 (LC3-II) in response to PFDA treatment compared with controls (Figure 2C and Supplementary Figure 4). These results suggested that neither apoptosis nor autophagy were key factors in the PFDA-induced cell amount promotion. However, cell senescence-associated  $\beta$ -galactosidase (SA- $\beta$ -gal) activity decreased following PFDA treatment, which was confirmed by a reduction in both the number of SA- $\beta$ -gal-stained cells and in the staining intensity (Figure 2D and 2E). In addition, the decreased expression of p16, p21 and p27 as well as changes in cell morphology were consistent with a negative effect of PFDA on cell senescence (Supplementary Figure 5 and Supplementary Figure 6). Overall, these results implied that cell senescence played an important role in PFDA-induced promotion of AGS cell growth.

### sPLA2-IIA and its transcription factor TCF4, are down-regulated in PFDA-treated gastric epithelial cells

In the result of DAVID analysis of the microarray data, the biological process (GOTERM\_BP\_FAT) that was most affected was GO: 0014070, i.e., response to an organic substance ( $p = 0.00074$ , the smallest GOTERM  $p$ -value). In line with cellular response to PFDA treatment, The Kyoto Encyclopedia of Genes and Genomes (KEGG) pathway with the lowest  $p$ -value ( $p = 0.011$ ) was the vascular endothelial growth factor (VEGF) signaling

pathway. In that pathway, all four genes (CDC42, SH2D2A, PTGS2 and PLA2G2A) were down-regulated, and the most down-regulated gene was sPLA2-IIA (PLA2G2A). Its expression was 21.4% of that in controls, and it was the third most changed among all the genes analyzed (Figure 3A). The upstream transcription factor of sPLA2-IIA, TCF4, was the second most changed gene, with a decreased in expression to 19.9% of controls after PFDA treatment. The decreased expression was verified by RT-qPCR and in western blots (Figures 3B, 4A and Supplementary Figure 7). The down-regulation of sPLA2-IIA and TCF4 expression was also observed in BGC823 and Bel-7402 cells. sPLA2-IIA and TCF4 mRNAs decreased 5.88 and 5.29 fold respectively in BGC823 (Supplementary Figure 8) after PFDA treatments, they even decayed to undetected levels in Bel-7402 cells.

### TCF4 regulation of gastric cell growth by sPLA2-IIA is influenced by PFDA treatment

To investigate the effects of TCF4 and sPLA2-IIA gene expression on cell proliferation, we transfected AGS gastric epithelial cells with TCF4 and sPLA2-IIA

expression plasmids (pENTER-*tcf4* and pENTER-*pla2g2a*) to stimulate TCF4 and sPLA2-IIA expression concomitant with PFDA treatment. Transfection was confirmed by sequencing using BLAST (Supplementary Figure 9). As shown in Figure 4A–4C, TCF4 and sPLA2-IIA expression was restored and expression levels of each gene were increased in dose-dependent manner after transfection. However, transfection of pENTER-*pla2g2a* did not affect TCF4 expression.

AGS cells were evaluated for changes in cell growth following transfection with pENTER-*tcf4* and pENTER-*pla2g2a*. As shown in Figure 4D, the growth rate of the transfected cells was reduced by 60% by pENTER-*tcf4* and 30% by pENTER-*pla2g2a* compared with PFDA-treated control cells. This is in line with the pattern of TCF4 and sPLA2-IIA expression in AGS cells, and was verified by CCK8 result of AGS transfected with sPLA2-IIA a siRNA alone (Supplementary Figure 10). However, proliferation rates of cells transfected with pENTER-*tcf4* and -sPLA2-IIAsiRNA were higher than in cells with only pENTER-*tcf4* transfection, suggesting that PFDA induced cell proliferation through regulation of sPLA2-IIA protein expression.

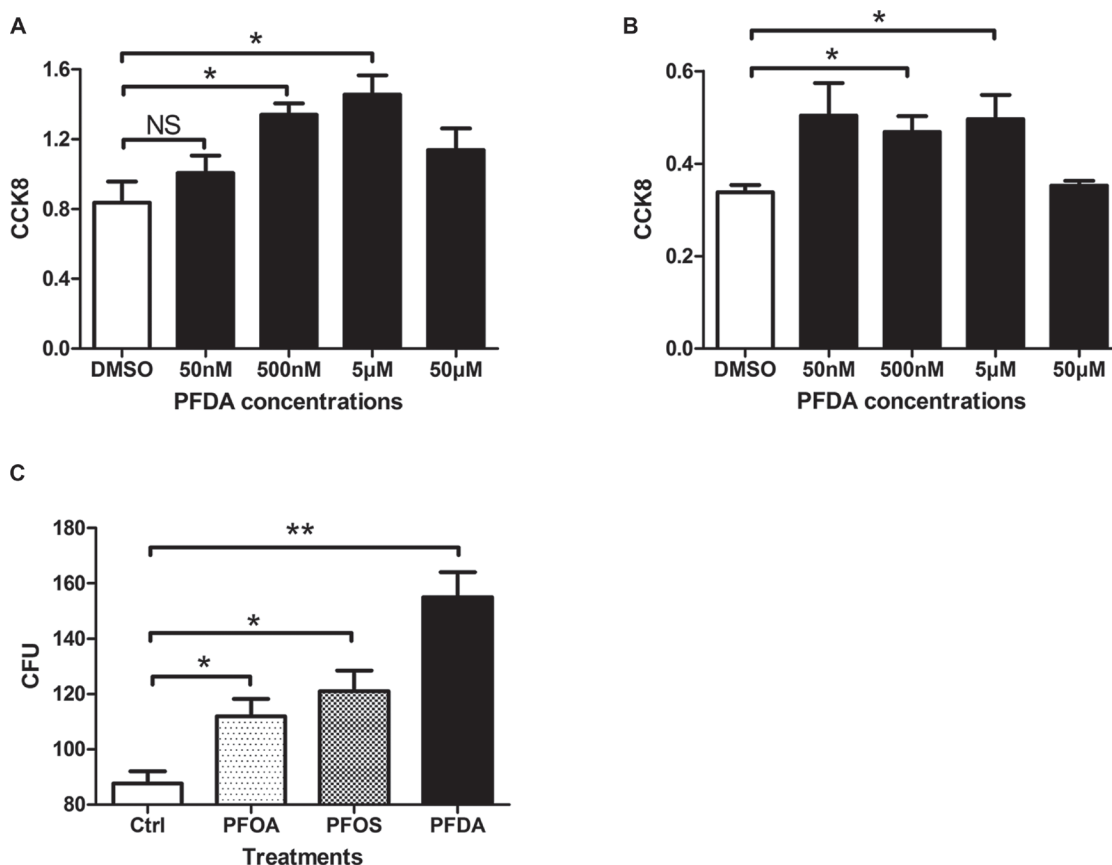

**Figure 1: PFDA significantly enhanced cell amount.** (A) Cell counting kit 8 assay of PFDA treated or control AGS cells ( $*p < 0.05$ ); (B) Cell counting kit 8 assay of Bel7402 treated with different concentrations of PFDA ( $*p < 0.05$ ); (C) Quantification of colonies on agar. Colony formation assays were performed as described in Materials and Methods. Experiments were performed in triplicate with similar results.

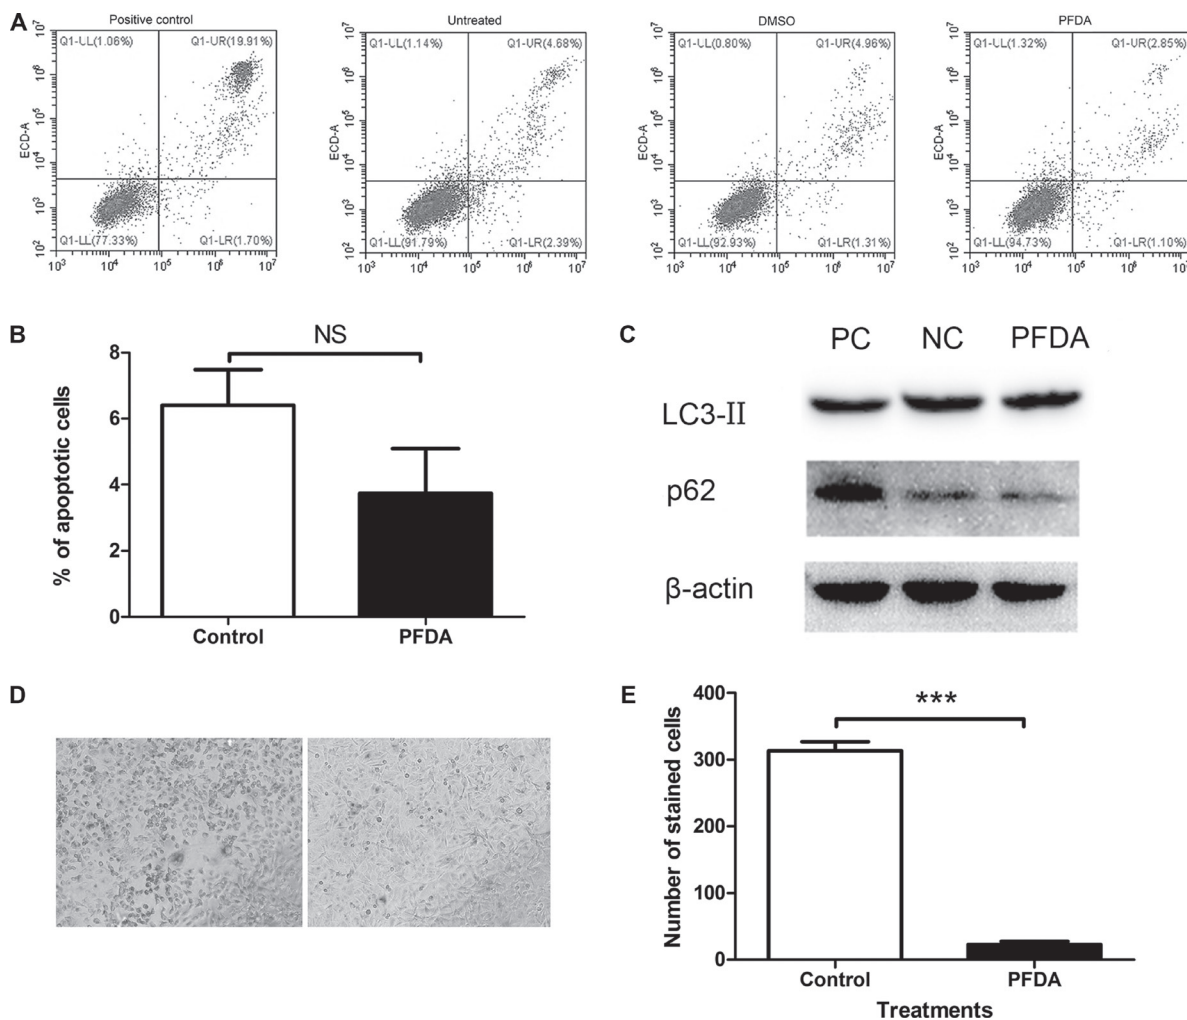

**Figure 2: PFDA treatment suppressed senescence of gastric epithelial cells.** (A) Both PFDA treated and non-treated cells showed low levels of apoptosis, and their difference was not significant; (B) Quantification of the apoptotic cells, there was no significant difference between PFDA treated and control cells; (C) Western blot of LC3-II and p62. NC: DMSO, PC: starvation; (D) Senescence-associated  $\beta$ -galactosidase (SA- $\beta$ -gal) activity assessment of PFDA treated and control cells; (E) Quantification of (D).  $***p < 0.001$ . Apoptosis analysis, western blot and SA- $\beta$ -gal activity assessment were performed as described in Materials and Methods.

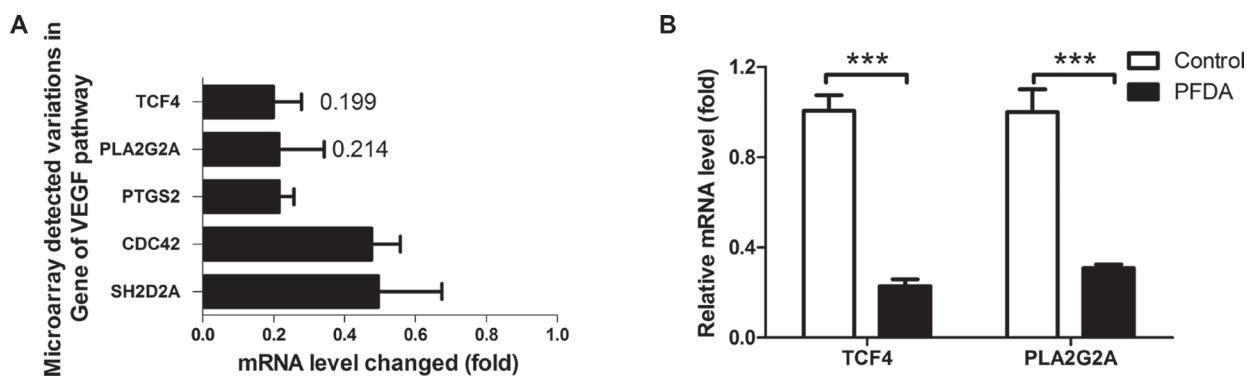

**Figure 3: PFDA treatment down-regulated expression of sPLA2-IIA and its up-stream target gene TCF4.** (A) Microarray analysis showed that TCF4 and PLA2G2A expression decreased 5.02 and 4.67 fold respectively concurrent with PFDA incubation; this decreased expression was verified by (B) RT-qPCR,  $***p < 0.001$ . Microarray analysis and RT-qPCR were performed as described in the Materials and Methods.

## sPLA2-IIA expression restored cell senescence and inhibited cell proliferation

The effects of sPLA2-IIA expression on cell senescence were investigated in AGS cells that over-expressed TCF4 and sPLA2-IIA. As shown in Figure 5, suppression of senescence was significantly increased two fold in cells expressing TCF4 and sPLA2-IIA compared with treatment-control cells. The results suggest that

PFDA induced suppression of cell senescence and then stimulated cell proliferation through regulation of sPLA2-IIA protein expression.

## DISCUSSION

Despite recent advances in understanding the molecular mechanisms perfluorinated environmental pollutants, many unanswered questions remain. PFDA may

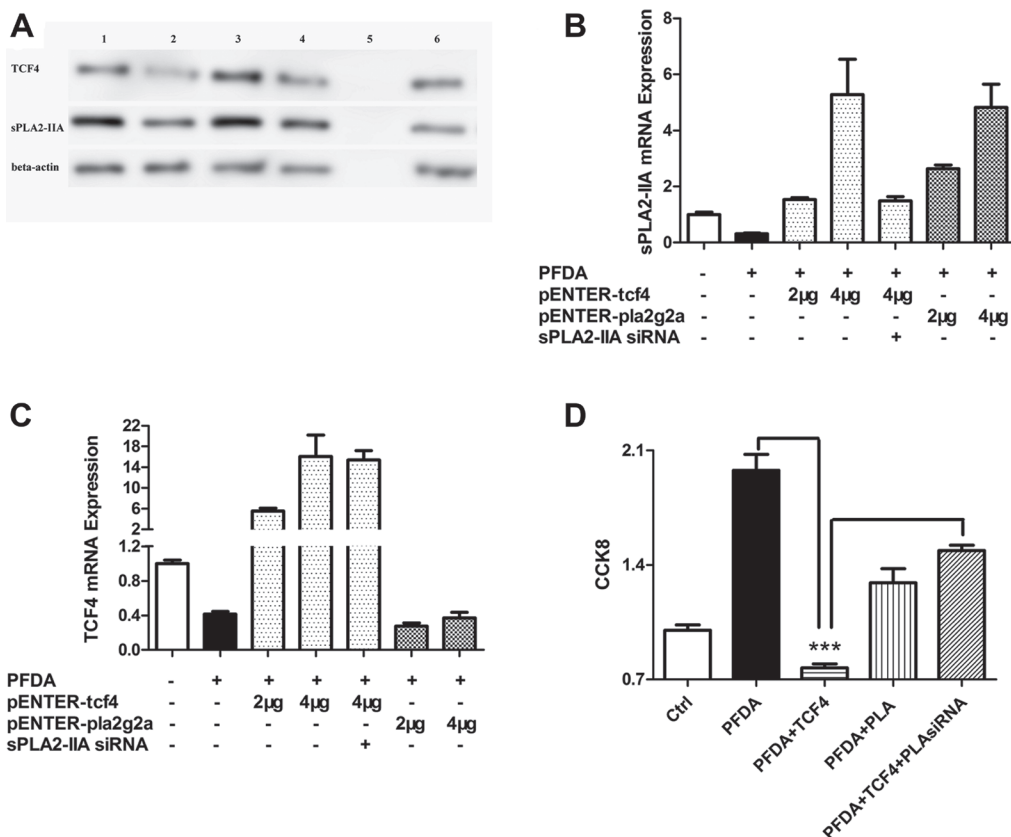

**Figure 4: TCF4 and sPLA2-IIA were involved in PFDA-associated cell proliferation promotion.** (A) Western blot analysis of TCF4 and sPLA2-IIA expression in AGS cells: 1, DMSO control; 2, AGS with PFDA treatment; 3, AGS with PFDA treatment and pENTER-tcf4 transfection; 4, AGS with PFDA treatment and pENTER-pla2g2a transfection; 5, protein marker; 6, AGS with PFDA treatment, pENTER-tcf4 transfection and interfered by sPLA2-IIA siRNA; (B) and (C) RT-qPCR analysis of sPLA2-IIA and TCF4 expression in AGS cells under the circumstance of sPLA2-IIA and TCF4 plasmid transfection; (D) CCK8 analysis of AGS cells as TCF4 and sPLA2-IIA proteins were administrated, \*\*\* $p < 0.001$ . Western blot and RT-qPCR were performed as described in Materials and Methods.

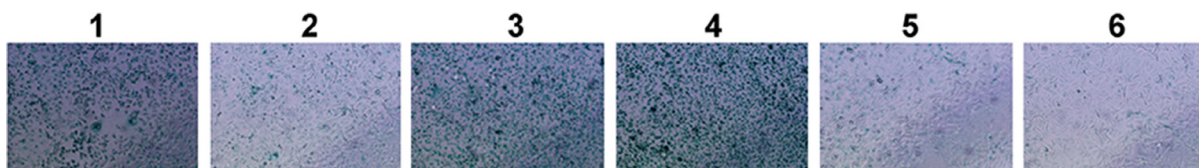

**Figure 5: SA-β-gal activity assessment of PFDA treated and transfected AGS cells.** 1, DMSO control; 2, AGS with PFDA treatment; 3, AGS with PFDA treatment and pENTER-tcf4 transfection; 4, AGS with PFDA treatment and pENTER-pla2g2a transfection; 5, AGS with PFDA treatment, pENTER-tcf4 transfection and interfered by sPLA2-IIA siRNA; 6, AGS interfered by sPLA2-IIA siRNA. SA-β-gal activity assessment was performed as described in Materials and Methods.

important for understanding the molecular mechanisms of peroxisome proliferation. It is thus hoped that PFDA can assist in dissecting the sequence of events that is initiated by peroxisome proliferator-activated receptor interactions and ultimately results in tumor formation [33].

Of the phospholipase A2 super family (sPLA2) subgroup members, type-IIA sPLA2 (sPLA2-IIA, encoded by *pla2g2a*) have the highest bactericidal activities, and may also be involved in cell signaling, apoptosis, remodeling of cell membranes, and inflammatory responses [55–59]. Gastric cancer patients with tumors expressing high levels of sPLA2-IIA have been shown to have significantly improved survival compared with patients having tumors with low sPLA2-IIA expression [60]. However, beyond this prognostic association, little is actually known of how sPLA2-IIA contributes to development and progression of gastric cancer. Although sPLA2-IIA has been proposed as a potential tumor suppressor, evidence supporting this model is conflicting [60–64]. In the microarray data of AGS treated by PFDA, the KEGG pathways sPLA2-IIA belonging to were VEGF and MAPK signaling pathway. FOS and FGF18 were included in the latter pathway and increased by 2.28 and 2.14 fold respectively. Given that FOS and FGF18 are involved in tumor growth, and invasion as well as PFDA stimulates cell growth and, the microarray data seemed to imply us that PFDA were involved in the processes of tumorigenesis. However, a previous report found a larger group of genes differentially expressed in primary human hepatocytes, such as FABP1, Ehhadh, Pdk4, Scd1 etc. Meanwhile, FABP1 was also found up-regulated in our microarray data of AGS [65].

In early-stage tumors, Wnt signaling is active, and drives cell proliferation and dedifferentiation by up-regulating genes with pro-oncogenic activity. The transcriptional coactivator  $\beta$ -catenin can translocate to the nucleus to bind T-cell specific factor (TCF)-4 and lymphoid-enhancer factor (LEF)-1, thereby regulating gene expression [66]. Ganesan et al. showed that sPLA2-IIA is a direct target of Wnt/ $\beta$ -catenin signaling in gastric cancer cells and functions to negatively regulate gastric cancer invasiveness and metastasis [67]. In this study, the association of TCF4 and sPLA2-IIA expression was identified by gene over-expression and siRNA knockdown.

Cellular senescence is the state of permanent cell cycle arrest, and represents an important mechanism of both tumor suppression and tissue maintenance [68, 69]. Either oncogene inhibition or activation of tumor suppression can induce premature senescence, which then serves as a failsafe mechanism to restrict tumor development. On the other hand, recent reports showed that senescent cells enhanced cell malignancy. Senescent cells develop a secretory phenotype (SASP) that can affect the behavior of neighboring cells. Strikingly, many SASP

factors are known to stimulate phenotypes associated with aggressive cancer cells, such as IL-6 and VEGF [70]. Senescence can be regulated by multiple pathways [71, 72]; however, the effects of PFDA and sPLA2-IIA on cellular senescence and its mechanism has not been reported previously. In this study, we demonstrated that PFDA enhanced growth of gastric epithelial cells. As to cell amount decreased after 24 and 48 h of PFDA treatment, the underlying mechanism could be PFDA suppressed glucose transport and NF- $\kappa$ B activation which directly affected the expression of a large number of genes and cell growth [73, 74]. The inhibiting the expression of sPLA2-IIA represents a new molecular mechanism engaged in regulating proliferation of gastric cancer cells.

## MATERIALS AND METHODS

Gastric adenocarcinoma cell line AGS and BGC823 were cultured and maintained in Ham's F-12 medium (HyClone, Utah, USA) supplemented with 10% FCS and 1% penicillin-streptomycin; the medium of Hepatocellular Carcinoma cell line Bel-7402 was RPMI-1640 (Life Technologies, California, USA) plus 10% FCS. The cultures were kept in a 5% CO<sub>2</sub> and 95% air humidified incubator at 37°C. PFDA was purchased from Sigma Chemical Company (St. Louis, MO, USA). The full-length human sPLA2-IIA and TCF4 cDNA expression plasmids: pENTER-*pla2g2a* and pENTER-*tcf4*, and the control plasmid pENTER-mock were purchased from Biosune Company (Shanghai, China). FuGENEs HD Transfection Reagent (Roche Applied Science, Basel, Switzerland) was used for the transfection of these plasmids according to the manufacturer's instructions.

## RNA extraction and quantitative real-time PCR

Total cellular RNA was extracted with Trizol (Life Technologies, California, USA) according to the manufacturer's protocol. First-strand cDNA was synthesized from 1  $\mu$ g of the extracted RNA using the RevertAid™ First Strand cDNA Synthesis Kit (Thermo Fisher Scientific, Massachusetts, USA). The cDNA was then amplified using specific primers as follow: human sPLA2-IIA forward primer 5'-TCACCCAAGAAGCTTACCA-3' and reverse primer 5'-CAGCCGTAGAAGCCATAA-3'; human TCF4 forward primer 5'-GGGGCTCATACTCATCTTA-3' and reverse primer 5'-CCCTATTGTAGTCGGCAGT-3';  $\beta$ -actin forward primer 5'-AGTTGCGTTACACCCCTTCTTG-3' and reverse primer 5'-CACCTTCACCGTTCCAGTTTT-3'. The real-time PCR reactions were performed on the ABI7000 Fast Real-Time PCR System with the SYBR Premix Ex Taq™. The reaction ran for 35 cycles, in which each cycle included a denaturation step at 95°C for 10 sec, primer annealing step at 55°C for 30 sec and primer extension step at 72°C for 30 sec.

## Western blot analysis

Western Blot Analysis was performed as described previously [75]. Briefly, cell lysates (20 µg/lane) were separated on 10% SDS polyacrylamide gel and then were transferred to a poly (vinylidene fluoride) membrane. sPLA2-IIA, p62 and LC3-II protein [76] was detected by a mouse monoclonal IgG (OriGene Co. Ltd, Beijing, China) and visualized by the enhanced chemiluminescence system (Amersham, Arlington Heights, IL, USA). The intensity of the bands was quantitated using the NIH image software package. The extent of sPLA2-IIA expression was evaluated through the ratio of their expression in experiment groups over their corresponding expression in the control groups. If the ratio equated to more than 1, it may indicate its over-expression.

## Colony formation assay

Gastric cell line AGS was cultured in a 6-well plate at a concentration of  $2 \times 10^5$  cells/well. It was treated with PFDA (Sigma Chemical Company, St. Louis, MO, USA) and its control reagent solvent DMSO. After a period of growth, the cells were trypsinized and re-plated into new 6-well plates at a concentration of 300 cells/well. After making up the volume to 3 ml/ well with culture medium, the plates were incubated at 37°C for a week. During this time, the formation of cell colonies could become visible. At that point, the colonies were washed with PBS buffer for 3 times before subjected to cell fixation using 1 ml of methanol at room temperature for 10 min. Then, 1 ml of diluted Giemsa dye was added into each well and incubated at room temperature for about 20–25 min. After incubation, the wells were washed gently and repeatedly with PBS until no residual background Giemsa dye was observed. Finally, the 6-well plate was scanned for colony counting and analysis.

## Cell apoptosis analysis

Cell apoptosis analysis was performed as instructed by the Annexin V, FITC conjugate [77, 78] manual (Thermo Fisher Scientific). Briefly,  $5 \times 10^5$  AGS cells in a well of 6-well plates were treated with certain concentration of PFDA and control DMSO, incubating for 72 h before the cells were digested and harvested by centrifugation. After harvested the cells and washed in cold phosphate-buffered saline (PBS), then the cells were centrifuged and discard the supernatants, then re-suspended the cells in Annexin-binding buffer. Add 5 µl Annexin V-FITC conjugate and PI per 100 µl solution to the suspended cells. After 15 min at room temperature in the dark, 400 µl Annexin-binding buffer was added. Keep the cells on ice and analyzed with flow cytometry equipped with an argon laser at 488 nm.

## Senescence-associated β-galactosidase (SA-β-gal) activity assessment

SA-β-gal activity was detected using a staining kit of SA-β-gal [79, 80], and it was performed according to the manufacturer's protocol. Briefly, AGS cells were seeded into a 24-well plate. The cells were treated with PFDA on day 3. After treatment, the cells were washed with PBS (pH7.2) twice before they were fixed with 3.7% formaldehyde in PBS for 3–5 min. Then, the SA-β-gal staining solution (1 mg/ml X-gal, 40 mM citric acid/sodium phosphate pH6.0, 5 mM potassium ferrocyanide, 150 mM NaCl, and 2 mM MgCl<sub>2</sub>) was added into each well before the plate was incubated at 37°C for 12–16 hr in the absence of CO<sub>2</sub>. Finally, the cells were rinsed with PBS and the plate was observed under the microscope, in which the number of the SA-β-gal positive cells was recorded. The experiment was performed in triplicate.

## Microarray analysis

The microarray chip consisted of 27326 probes for different human cDNAs (Capitalbio Company, Beijing, China), in which the house-keeping gene glyceraldehyde-3-phosphate dehydrogenase (GAPDH) was served as internal control. The cDNAs extracted from PFDA-treated AGS cells were labeled with Cy3, while the cDNAs from the control DMSO-treated AGS cells were labeled with Cy5. The labeled cDNAs were then hybridized with microarray chip under standard conditions according to manufacturer's instructions. Changes in mRNA expression in response to PFDA stimulation were assayed in DNA microarrays. Two fold up- or down regulation were set as cutoff values, and changes in gene expression were analyzed using the Database for Annotation, Visualization and Integrated Discovery (DAVID).

## Statistical data analysis

All experiments except microarray analysis were repeated at least three times and the data were expressed as mean ± standard deviation (SD). The differences between the three groups were compared using the Student's *t*-tests and  $P < 0.05$  (\*) was considered statistically significant.

## ACKNOWLEDGMENTS AND FUNDING

We gratefully acknowledge the financial support from The National Natural Science Foundation of China (81272351), The Fundamental Research Funds of Shandong University (2015JC010), Project of Medical and Health Technology Development Program in Shandong province (Grant No. 2014ws0349) and Open Research Fund of State Key Laboratory of Environmental Chemistry and Ecotoxicology (KF2014-08).

## CONFLICTS OF INTEREST

None.

## REFERENCES

1. Guenther R, Vietork L. Surface active materials from perfluorocarboxylic and perfluorosulfonic acids. *I&ED Prod. Res Dev.* 1962; 1:165–69.
2. Shinoda K, Nomura T. Miscibility of fluorocarbon and hydrocarbon surfactant in micelles and liquid mixtures: basic studies of oil repellent and fire extinguishing agents. *J Phys Chem.* 1980; 8:365–69.
3. Mak YL, Taniyasu S, Yeung LW, Lu G, Jin L, Yang Y, Lam PK, Kannan K, Yamashita N. Perfluorinated compounds in tap water from China and several other countries. *Environ Sci Technol.* 2009; 43:4824–29.
4. Wang J, Pan Y, Shi Y, Cai Y. Perfluorinated compounds pollution levels in snowfall of Beijing urban area. *Scientia Sinica Chimica.* 2011; 41:900–06.
5. Falandysz J, Taniyasu S, Gulkowska A, Yamashita N, Schulte-Oehlmann U. Is fish a major source of fluorinated surfactants and repellents in humans living on the Baltic Coast? *Environ Sci Technol.* 2006; 40:748–51.
6. Houde M, Martin JW, Letcher RJ, Solomon KR, Muir DC. Biological monitoring of polyfluoroalkyl substances: A review. *Environ Sci Technol.* 2006; 40:3463–73.
7. Kim SK, Kannan K. Perfluorinated acids in air, rain, snow, surface runoff, and lakes: relative importance of pathways to contamination of urban lakes. *Environ Sci Technol.* 2007; 41:8328–34.
8. Sinclair E, Mayack DT, Roblee K, Yamashita N, Kannan K. Occurrence of perfluoroalkyl surfactants in water, fish, and birds from New York State. *Arch Environ Contam Toxicol.* 2006; 50:398–410.
9. Nguyen VT, Gin KY, Reinhard M, Liu C. Occurrence, fate, and fluxes of perfluorochemicals (PFCs) in an urban catchment: marina Reservoir, Singapore. *Water Sci Technol.* 2012; 66:2439–46.
10. Calafat AM, Kuklenyik Z, Reidy JA, Caudill SP, Tully JS, Needham LL. Serum concentrations of 11 polyfluoroalkyl compounds in the u.s. population: data from the national health and nutrition examination survey (NHANES). *Environ Sci Technol.* 2007; 41:2237–42.
11. Calafat AM, Wong LY, Kuklenyik Z, Reidy JA, Needham LL, Needham L. Polyfluoroalkyl chemicals in the U.S. population: data from the National Health and Nutrition Examination Survey (NHANES) 2003-2004 and comparisons with NHANES 1999-2000. *Environ Health Perspect.* 2007; 115:1596–602.
12. Fei C, McLaughlin JK, Tarone RE, Olsen J. Fetal growth indicators and perfluorinated chemicals: a study in the Danish National Birth Cohort. *Am J Epidemiol.* 2008; 168:66–72.
13. Olsen GW, Church TR, Larson EB, van Belle G, Lundberg JK, Hansen KJ, Burris JM, Mandel JH, Zobel LR. Serum concentrations of perfluorooctanesulfonate and other fluorochemicals in an elderly population from Seattle, Washington. *Chemosphere.* 2004; 54:1599–611.
14. Olsen GW, Mair DC, Reagen WK, Ellefson ME, Ehresman DJ, Butenhoff JL, Zobel LR. Preliminary evidence of a decline in perfluorooctanesulfonate (PFOS) and perfluorooctanoate (PFOA) concentrations in American Red Cross blood donors. *Chemosphere.* 2007; 68:105–11.
15. Tao L, Kannan K, Aldous KM, Mauer MP, Eadon GA. Biomonitoring of perfluorochemicals in plasma of New York State personnel responding to the World Trade Center disaster. *Environ Sci Technol.* 2008; 42:3472–78.
16. De Silva AO, Mabury SA. Isolating isomers of perfluorocarboxylates in polar bears (*Ursus maritimus*) from two geographical locations. *Environ Sci Technol.* 2004; 38:6538–45.
17. Oono S, Matsubara E, Harada KH, Takagi S, Hamada S, Asakawa A, Inoue K, Watanabe I, Koizumi A. Survey of airborne polyfluorinated telomers in Keihan area, Japan. *Bull Environ Contam Toxicol.* 2008; 80:102–06.
18. Skutlarek D, Exner M, Färber H. Perfluorinated surfactants in surface and drinking waters. *Environ Sci Pollut Res Int.* 2006; 13:299–307.
19. Trudel D, Horowitz L, Wormuth M, Scheringer M, Cousins IT, Hungerbühler K. Estimating consumer exposure to PFOS and PFOA. *Risk Anal.* 2008; 28:251–69.
20. George ME, Andersen ME. Toxic effects of nonadecafluoro-n-decanoic acid in rats. *Toxicol Appl Pharmacol.* 1986; 85:169–80.
21. Harris MW, Uraih LC, Birnbaum LS. Acute toxicity of perfluorodecanoic acid in C57BL/6 mice differs from 2,3,7,8-tetrachlorodibenzo-p-dioxin. *Fundam Appl Toxicol.* 1989; 13:723–36.
22. Jensen AA, Leffers H. Emerging endocrine disrupters: perfluoroalkylated substances. *Int J Androl.* 2008; 31:161–69.
23. Langley AE. Effects of perfluoro-n-decanoic acid on the respiratory activity of isolated rat liver mitochondria. *J Toxicol Environ Health.* 1990; 29:329–36.
24. Son HY, Kim SH, Shin HI, Bae HI, Yang JH. Perfluorooctanoic acid-induced hepatic toxicity following 21-day oral exposure in mice. *Arch Toxicol.* 2008; 82:239–46.
25. Wolf DC, Moore T, Abbott BD, Rosen MB, Das KP, Zehr RD, Lindstrom AB, Strynar MJ, Lau C. Comparative hepatic effects of perfluorooctanoic acid and WY 14,643 in PPAR-alpha knockout and wild-type mice. *Toxicol Pathol.* 2008; 36:632–39.
26. Cheng X, Klaassen CD. Critical role of PPAR-alpha in perfluorooctanoic acid- and perfluorodecanoic acid-induced downregulation of Oatp uptake transporters in mouse livers. *Toxicol Sci.* 2008; 106:37–45.
27. Cheng X, Klaassen CD. Perfluorocarboxylic acids induce cytochrome P450 enzymes in mouse liver through



- activation of PPAR-alpha and CAR transcription factors. *Toxicol Sci.* 2008; 106:29–36.
28. Ikeda T, Ida-Enomoto M, Mori I, Fukuda K, Iwabuchi H, Komai T, Suga T. Induction of peroxisome proliferation in rat liver by dietary treatment with 2,2,4,4,6,8,8-heptamethylnonane. *Xenobiotica.* 1988; 18:1271–80.
  29. Kawashima Y, Kobayashi H, Miura H, Kozuka H. Characterization of hepatic responses of rat to administration of perfluorooctanoic and perfluorodecanoic acids at low levels. *Toxicology.* 1995; 99:169–78.
  30. Reo NV, Narayanan L, Kling KB, Adinezhadeh M. Perfluorodecanoic acid, a peroxisome proliferator, activates phospholipase C, inhibits CTP:phosphocholine cytidyltransferase, and elevates diacylglycerol in rat liver. *Toxicol Lett.* 1996; 86:1–11.
  31. Chinje E, Kentish P, Jarnot B, George M, Gibson G. Induction of the CYP4A subfamily by perfluorodecanoic acid: the rat and the guinea pig as susceptible and non-susceptible species. *Toxicol Lett.* 1994; 71:69–75.
  32. Sterchele PF, Vanden Heuvel JP, Davis JW 2nd, Shrago E, Knudsen J, Peterson RE. Induction of hepatic acyl-CoA-binding protein and liver fatty acid-binding protein by perfluorodecanoic acid in rats. Lack of correlation with hepatic long-chain acyl-CoA levels. *Biochem Pharmacol.* 1994; 48:955–66.
  33. Vanden Heuvel JP. Perfluorodecanoic acid as a useful pharmacologic tool for the study of peroxisome proliferation. *Gen Pharmacol.* 1996; 27:1123–29.
  34. Olson CT, Andersen ME. The acute toxicity of perfluorooctanoic and perfluorodecanoic acids in male rats and effects on tissue fatty acids. *Toxicol Appl Pharmacol.* 1983; 70:362–72.
  35. Langley AE, Pilcher GD. Thyroid, bradycardic and hypothermic effects of perfluoro-n-decanoic acid in rats. *J Toxicol Environ Health.* 1985; 15:485–91.
  36. Benninghoff AD, Bisson WH, Koch DC, Ehresman DJ, Kolluri SK, Williams DE. Estrogen-like activity of perfluoroalkyl acids in vivo and interaction with human and rainbow trout estrogen receptors in vitro. *Toxicol Sci.* 2011; 120:42–58.
  37. Bookstaff RC, Moore RW, Ingall GB, Peterson RE. Androgenic deficiency in male rats treated with perfluorodecanoic acid. *Toxicol Appl Pharmacol.* 1990; 104:322–33.
  38. Kjeldsen LS, Bonefeld-Jørgensen EC. Perfluorinated compounds affect the function of sex hormone receptors. *Environ Sci Pollut Res Int.* 2013; 20:8031–44.
  39. Persson S, Magnusson U. Environmental pollutants and alterations in the reproductive system in wild male mink (*Neovison vison*) from Sweden. *Chemosphere.* 2015; 120:237–45.
  40. Gutshall DM, Pilcher GD, Langley AE. Mechanism of the serum thyroid hormone lowering effect of perfluoro-n-decanoic acid (PFDA) in rats. *J Toxicol Environ Health.* 1989; 28:53–65.
  41. Pilcher GD, Gutshall DM, Langley AE. The effects of perfluoro-n-decanoic acid (PFDA) on rat heart beta-receptors, adenylate cyclase, and fatty acid composition. *Toxicol Appl Pharmacol.* 1987; 90:198–205.
  42. Van Rafelghem MJ, Inhorn SL, Peterson RE. Effects of perfluorodecanoic acid on thyroid status in rats. *Toxicol Appl Pharmacol.* 1987; 87:430–39.
  43. Benninghoff AD, Orner GA, Buchner CH, Hendricks JD, Duffy AM, Williams DE. Promotion of hepatocarcinogenesis by perfluoroalkyl acids in rainbow trout. *Toxicol Sci.* 2012; 125:69–78.
  44. Borges T, Peterson RE, Pitot HC, Robertson LW, Glauert HP. Effect of the peroxisome proliferator perfluorodecanoic acid on the promotion of two-stage hepatocarcinogenesis in rats. *Cancer Lett.* 1993; 72:111–20.
  45. Borges T, Robertson LW, Peterson RE, Glauert HP. Dose-related effects of perfluorodecanoic acid on growth, feed intake and hepatic peroxisomal beta-oxidation. *Arch Toxicol.* 1992; 66:18–22.
  46. Upham BL, Deocampo ND, Wurl B, Trosko JE. Inhibition of gap junctional intercellular communication by perfluorinated fatty acids is dependent on the chain length of the fluorinated tail. *Int J Cancer.* 1998; 78:491–95.
  47. Wilson MW, Lay LT, Chow CK, Tai HH, Robertson LW, Glauert HP. Altered hepatic eicosanoid concentrations in rats treated with the peroxisome proliferators ciprofibrate and perfluorodecanoic acid. *Arch Toxicol.* 1995; 69:491–97.
  48. Nelson DL, Frazier DE Jr, Ericson JE, Tarr MJ, Mathes LE. The effects of perfluorodecanoic acid (PFDA) on humoral, cellular, and innate immunity in Fischer 344 rats. *Immunopharmacol Immunotoxicol.* 1992; 14:925–38.
  49. Godin CS, Myhr BC, Lawlor TE, Young RR, Murlin H, Cifone MA. Assessment of the potential genotoxicity of perfluorodecanoic acid and chlorotrifluoroethylene trimer and tetramer acids. *Fundam Appl Toxicol.* 1992; 18:557–69.
  50. Liu C, Chang VW, Gin KY, Nguyen VT. Genotoxicity of perfluorinated chemicals (PFCs) to the green mussel (*Perna viridis*). *Sci Total Environ.* 2014; 487:117–22.
  51. Winkelstein W Jr, Kantor S. Stomach cancer. Positive association with suspended particulate air pollution. *Arch Environ Health.* 1969; 18:544–47.
  52. Ashley DJ. Environmental factors in the aetiology of gastric cancer. *Br J Prev Soc Med.* 1969; 23:187–89.
  53. Zou X. Environmental Pollution and Epidemic of Common Cancers in China. *Keji Daobao.* 2014; 32:58–64.
  54. Klenow S, Heinemeyer G, Brambilla G, Dellatte E, Herzke D, de Voogt P. Dietary exposure to selected perfluoroalkyl acids (PFAAs) in four European regions. *Food Addit Contam Part A Chem Anal Control Expo Risk Assess.* 2013; 30:2141–51.
  55. Kudo I, Murakami M. Phospholipase A2 enzymes. Prostaglandins Other Lipid Mediat. 2002; 68-69:3–58.

56. Grönroos JO, Laine VJ, Nevalainen TJ. Bactericidal group IIA phospholipase A2 in serum of patients with bacterial infections. *J Infect Dis.* 2002; 185:1767–72.
57. Koduri RS, Grönroos JO, Laine VJ, Le Calvez C, Lambeau G, Nevalainen TJ, Gelb MH. Bactericidal properties of human and murine groups I, II, V, X, and XII secreted phospholipases A(2). *J Biol Chem.* 2002; 277:5849–57.
58. Laine VJ, Grass DS, Nevalainen TJ. Resistance of transgenic mice expressing human group II phospholipase A2 to *Escherichia coli* infection. *Infect Immun.* 2000; 68:87–92.
59. Six DA, Dennis EA. The expanding superfamily of phospholipase A(2) enzymes: classification and characterization. *Biochim Biophys Acta.* 2000; 1488:1–19.
60. Leung SY, Chen X, Chu KM, Yuen ST, Mathy J, Ji J, Chan AS, Li R, Law S, Troyanskaya OG, Tu IP, Wong J, So S, et al. Phospholipase A2 group IIA expression in gastric adenocarcinoma is associated with prolonged survival and less frequent metastasis. *Proc Natl Acad Sci USA.* 2002; 99:16203–08.
61. Belinsky GS, Rajan TV, Saria EA, Giardina C, Rosenberg DW. Expression of secretory phospholipase A2 in colon tumor cells potentiates tumor growth. *Mol Carcinog.* 2007; 46:106–16.
62. Cormier RT, Hong KH, Halberg RB, Hawkins TL, Richardson P, Mulherkar R, Dove WF, Lander ES. Secretory phospholipase Pla2g2a confers resistance to intestinal tumorigenesis. *Nat Genet.* 1997; 17:88–91.
63. Graff JR, Konicek BW, Deddens JA, Chedid M, Hurst BM, Colligan B, Neubauer BL, Carter HW, Carter JH. Expression of group IIA secretory phospholipase A2 increases with prostate tumor grade. *Clin Cancer Res.* 2001; 7:3857–61.
64. MacPhee M, Chepenik KP, Liddell RA, Nelson KK, Siracusa LD, Buchberg AM. The secretory phospholipase A2 gene is a candidate for the Mom1 locus, a major modifier of ApcMin-induced intestinal neoplasia. *Cell.* 1995; 81:957–66.
65. Rosen MB, Das KP, Wood CR, Wolf CJ, Abbott BD, Lau C. Evaluation of perfluoroalkyl acid activity using primary mouse and human hepatocytes. *Toxicology.* 2013; 308:129–37.
66. Clevers H. Wnt/beta-catenin signaling in development and disease. *Cell.* 2006; 127:469–80.
67. Ganesan K, Ivanova T, Wu Y, Rajasegaran V, Wu J, Lee MH, Yu K, Rha SY, Chung HC, Ylstra B, Meijer G, Lian KO, Grabsch H, Tan P. Inhibition of gastric cancer invasion and metastasis by PLA2G2A, a novel beta-catenin/TCF target gene. *Cancer Res.* 2008; 68:4277–86.
68. Collado M, Serrano M. Senescence in tumours: evidence from mice and humans. *Nat Rev Cancer.* 2010; 10:51–57.
69. Kuilman T, Michaloglou C, Mooi WJ, Peeper DS. The essence of senescence. *Genes Dev.* 2010; 24:2463–79.
70. Coppé JP, Kauser K, Campisi J, Beauséjour CM. Secretion of vascular endothelial growth factor by primary human fibroblasts at senescence. *J Biol Chem.* 2006; 281:29568–74.
71. Campisi J. Aging, cellular senescence, and cancer. *Annu Rev Physiol.* 2013; 75:685–705.
72. Campisi J, d'Adda di Fagagna F. Cellular senescence: when bad things happen to good cells. *Nat Rev Mol Cell Biol.* 2007; 8:729–40.
73. Goecke-Flora CM, Wyman JF, Jarnot BM, Reo NV. Effect of the peroxisome proliferator perfluoro-n-decanoic acid on glucose transport in the isolated perfused rat liver. *Chem Res Toxicol.* 1995; 8:77–81.
74. Corsini E, Sangiovanni E, Avogadro A, Galbiati V, Viviani B, Marinovich M, Galli CL, Dell'Agli M, Germolec DR. In vitro characterization of the immunotoxic potential of several perfluorinated compounds (PFCs). *Toxicol Appl Pharmacol.* 2012; 258:248–55.
75. Wang H, Sun Y, Liu S, Yu H, Li W, Zeng J, Chen C, Jia J. Upregulation of progranulin by *Helicobacter pylori* in human gastric epithelial cells via p38MAPK and MEK1/2 signaling pathway: role in epithelial cell proliferation and migration. *FEMS Immunol Med Microbiol.* 2011; 63:82–92.
76. Mizushima N, Yoshimori T. How to interpret LC3 immunoblotting. *Autophagy.* 2007; 3:542–45.
77. Bossy-Wetzel E, Green DR. Detection of apoptosis by annexin V labeling. *Methods Enzymol.* 2000; 322:15–18.
78. Hetz C, Vitte PA, Bombrun A, Rostovtseva TK, Montessuit S, Hiver A, Schwarz MK, Church DJ, Korsmeyer SJ, Martinou JC, Antonsson B. Bax channel inhibitors prevent mitochondrion-mediated apoptosis and protect neurons in a model of global brain ischemia. *J Biol Chem.* 2005; 280:42960–70.
79. Cristofalo VJ. SA beta Gal staining: biomarker or delusion. *Exp Gerontol.* 2005; 40:836–38.
80. Kurz DJ, Decary S, Hong Y, Erusalimsky JD. Senescence-associated (beta)-galactosidase reflects an increase in lysosomal mass during replicative ageing of human endothelial cells. *J Cell Sci.* 2000; 113:3613–22.
